# Supplementary material
Source: publisher figshare collection journal article supplement (https://acs.figshare.com/ndownloader/files/3770095)
Supplement: Supplementary file 1 [file 3770095]

#============================================================================
data_global
#============================================================================

_audit_creation_date               18-12-12
_audit_creation_method
     'SHELXL and local programs'
_audit_update_record
; ?
;

# 1. SUBMISSION DETAILS

 
_publ_contact_author_name     'Fanwick, Phillip E.'
_publ_contact_author_address
;    Department of Chemistry
     Purdue University
     560 Oval Dr.
     W. Lafayette
     IN 47907-2084
     USA
;
_publ_contact_author_email     'pfanwick@purdue.edu'
_publ_contact_author_fax       '1(765)4940239'
_publ_contact_author_phone     '1(765)4944572'

_publ_requested_journal            ?
_publ_requested_category            ?
_publ_requested_coeditor_name      ?


# 2. PROCESSING SUMMARY (IUCr Office Use Only)

_journal_date_recd_electronic     ?
_journal_date_to_coeditor         ?
_journal_date_from_coeditor       ?
_journal_date_accepted            ?

_journal_date_printers_first      ?
_journal_date_printers_final      ?
_journal_date_proofs_out          ?
_journal_date_proofs_in           ?


_journal_coeditor_name            ?
_journal_coeditor_code            ?
_journal_coeditor_notes
; ?
;

_journal_techeditor_code          ?
_journal_techeditor_notes
; ?
;


_journal_coden_Cambridge            ?
_journal_name_full                ?
_journal_volume                 ?

_journal_year               ?

_journal_issue                    ?
_journal_page_first               ?
_journal_page_last                ?

_journal_suppl_publ_number        ?
_journal_suppl_publ_pages         ?

# 3. TITLE AND AUTHOR LIST

_publ_section_title
; ?
;
_publ_section_title_footnote
; ?
;

# The loop structure below should contain the names and addresses and footnotes
# of all authors, in the required order of publication. Repeat as necessary.

loop_
_publ_author_name
_publ_author_address
_publ_author_footnote

     'Cladis, Dennis'
;    Department of Chemistry
     Purdue University 
     W. Lafayette
     IN 47907
     USA
;
; ?
;

     'Bart, Suzanne C.'
;    Department of Chemistry
     Purdue University 
     W. Lafayette
     IN 47907
     USA
;
; ?
;

     'Fanwick, Phillip E.'
;    Department of Chemistry
     Purdue University 
     W. Lafayette
     IN 47907
     USA
;
; ?
;


# 4. TEXT

_publ_section_abstract
; ?
;

_publ_section_comment
; ?
;


_database_code_CSD  'DENIS1'

_publ_section_experimental
; ?
;


_publ_section_references
;


P.T. Beurskens, G. Beurskens, R. deGelder,S. Garcia-Granda,
R.O. Gould, J.M.M. Smits, (2008).
The DIRDIF2008 Program System. Crystallography Laboratory,
University. of Nijmegen, The Netherlands.

Johnson, C.K. (1976). ORTEP. Report ORNL-5138.  Oak Ridge National Laboratory,
Tennessee, USA.

Nonius(1998), Collect Users Manual, Nonius Delft, The Netherlands.

Otwinowski Z. & Minor, W. (1997). Methods Enzymol.,      276, 307-327.

Prince, E. and Nicholson, W. L. (1983).Acta Cryst A39, 407-410.

Sheldrick, G.M. (2008). Acta Cryst.,A64, 112-122.

Spek A.L.(2003). J. Appl. Cryst.,36, 7-13.

;

_publ_section_figure_captions
; ?
;


_publ_section_acknowledgements
;?
;


data_DENIS1

# 5. CRYSTAL DATA

_chemical_compound_source          ?
_exptl_crystal_description         needle              
_exptl_crystal_colour              '1blue'
_exptl_crystal_size_max            0.90
_exptl_crystal_size_mid            0.60
_exptl_crystal_size_min            0.30
_chemical_name_systematic
; ?
;
_chemical_absolute_configuration     ad  
_chemical_formula_sum    'C45 H62 N3 O4 U1'
_chemical_formula_moiety   'C37 H46 N3 O2 U1,2(C4 H8 O1)'
_chemical_formula_structural       ?
_chemical_formula_weight              947.04
_symmetry_cell_setting             orthorhombic
_symmetry_space_group_name_Hall     'P 2ac 2ab'
_symmetry_space_group_name_H-M     'P 21 21 21'
loop_
 _symmetry_equiv_pos_as_xyz
 'x, y, z'
 '-x+1/2, -y, z+1/2'
 '-x, y+1/2, -z+1/2'
 'x+1/2, -y+1/2, -z'
 
_cell_length_a                      11.3098(5)  
_cell_length_b                      18.6329(7)  
_cell_length_c                      19.8541(10) 
_cell_angle_alpha                   90.00
_cell_angle_beta                    90.00
_cell_angle_gamma                   90.00
_cell_volume                        4183.9(3)   
_cell_measurement_reflns_used       32208
_cell_measurement_theta_min          1
_cell_measurement_theta_max         28
_cell_formula_units_z                4
_exptl_crystal_density_diffrn       1.503
_exptl_crystal_density_meas        ?
_exptl_crystal_density_method      'not measured'

loop_                                                                   
 _atom_type_symbol                                                      
 _atom_type_description                                                 
 _atom_type_scat_dispersion_real                                        
 _atom_type_scat_dispersion_imag                                        
 _atom_type_scat_source                                                 
 'C'  'C'   0.0033   0.0016                                             
 'International Tables Vol C Tables 4.2.6.8 and 6.1.1.4'                
 'H'  'H'   0.0000   0.0000                                             
 'International Tables Vol C Tables 4.2.6.8 and 6.1.1.4'                
 'N'  'N'   0.0061   0.0033                                             
 'International Tables Vol C Tables 4.2.6.8 and 6.1.1.4'                
 'O'  'O'   0.0106   0.0060                                             
 'International Tables Vol C Tables 4.2.6.8 and 6.1.1.4'                
 'U'  'U'  -9.6767   9.6646                                             
 'International Tables Vol C Tables 4.2.6.8 and 6.1.1.4'                
 
_diffrn_radiation_type             MO-K\a
_diffrn_radiation_wavelength         0.71073
_exptl_absorpt_coefficient_mu          3.924
_cell_measurement_temperature        150.00(2)
_exptl_crystal_F_000                1908

# 6. DATA COLLECTION

_diffrn_ambient_temperature        150.00(2)
_diffrn_measurement_device_type    Nonius_KappaCCD
_diffrn_radiation_monochromator  'graphite 002'
_diffrn_measurement_method         \w
_exptl_absorpt_correction_type     multi-scan
_exptl_absorpt_process_details  'SCALEPACK (Otwinowski & Minor, 1997)'
_exptl_absorpt_correction_T_min    0.2788
_exptl_absorpt_correction_T_max    0.3081
_diffrn_reflns_number               32208
_diffrn_measured_fraction_theta_max 0.9700
_diffrn_reflns_theta_full            28.3
_diffrn_measured_fraction_theta_full     0.9700
_reflns_number_total                 9939
_reflns_Friedel_coverage           0.8741
_reflns_number_gt                    7865
_reflns_threshold_expression         >2.0\s(I)
_diffrn_reflns_av_sigmaI/netI    0.0831
_diffrn_reflns_av_R_equivalents    0.1190
_diffrn_reflns_theta_min            2.07
_diffrn_reflns_theta_max           28.34
_diffrn_reflns_limit_h_min           -14
_diffrn_reflns_limit_k_min           -24
_diffrn_reflns_limit_l_min           -26
_diffrn_reflns_limit_h_max            14
_diffrn_reflns_limit_k_max            24
_diffrn_reflns_limit_l_max            26
_diffrn_special_details           'mosaicity from Denzo/Scalepack is 0.56'
_diffrn_standards_number              0
_diffrn_standards_interval_time .
_diffrn_standards_decay_% ?

# 7. REFINEMENT DATA


_refine_special_details
;
Outlier data were removed using a local program based on the method of Prince 
 and Nicholson.


Refinement on F^2^ for ALL reflections except for   0 with very negative F^2^
or flagged by the user for potential systematic errors.  Weighted R-factors
wR and all goodnesses of fit S are based on F^2^, conventional R-factors R
are based on F, with F set to zero for negative F^2^. The observed criterion
of F^2^ > 2sigma(F^2^) is used only for calculating R_factor_obs etc. and is
not relevant to the choice of reflections for refinement.  R-factors based
on F^2^ are statistically about twice as large as those based on F, and R-
factors based on ALL data will be even larger.
;


_refine_ls_structure_factor_coef   Fsqd
_refine_ls_matrix_type             full
_refine_ls_R_factor_all            0.097
_refine_ls_R_factor_gt             0.062
_refine_ls_wR_factor_ref           0.125
_refine_ls_wR_factor_gt           0.108
_refine_ls_hydrogen_treatment      constr
_refine_ls_number_reflns             9939
_refine_ls_number_parameters          490
_refine_ls_number_restraints          199
_refine_ls_goodness_of_fit_ref      1.096
_refine_ls_weighting_scheme  'calc '
_refine_ls_weighting_details
'1/[\s^2^(Fo^2^)+(0.0000P)^2^+54.2621P] where P=(Fo^2^+2Fc^2^)/3 '

_refine_ls_shift/su_max           0.002
_refine_diff_density_max            1.37
_refine_diff_density_min           -1.51
_refine_ls_extinction_method       none
_refine_ls_abs_structure_details
      'Flack H. D. (1983), Acta Cryst. A39, 876-881'
_refine_ls_abs_structure_Flack      -0.010(13)   

# 8. COMPUTING DATA


_computing_data_collection         'Collect (Nonius, 1998)'
_computing_cell_refinement         'DENZO/SCALEPACK (Otwinowski & Minor, 1996)'
_computing_data_reduction          'DENZO/SCALEPACK (Otwinowski & Minor, 1996)'
_computing_structure_solution
;
 PATTY (DIRDIF, Beurskins, 2008)
;
_computing_structure_refinement    'SHELX97 (Sheldrick, 2008)'
_computing_molecular_graphics
;
    ORTEP (Johnson, 1976)
    PLATON (Spek, 2003)
;
_computing_publication_material    'SHELX97(Sheldrick, 2008) and local programs'

# 9. ATOMIC COORDINATES AND THERMAL PARAMETERS


loop_
_atom_site_label
_atom_site_fract_x
_atom_site_fract_y
_atom_site_fract_z
_atom_site_U_iso_or_equiv
_atom_site_adp_type
_atom_site_occupancy
_atom_site_symmetry_multiplicity
_atom_site_calc_flag
_atom_site_refinement_flags
_atom_site_disorder_assembly
_atom_site_disorder_group

U1  0.85140(3) 0.838404(18) 0.834967(17) 0.01899(8) Uani 1 1 d U . .
O1  0.9634(5) 0.8376(4) 0.8987(3) 0.0250(13) Uani 1 1 d U . .
O2  0.7309(6) 0.8241(3) 0.7777(3) 0.0235(14) Uani 1 1 d U . .
O911  1.0416(19) 0.9159(12) 0.1715(12) 0.176(8) Uani 1 1 d U . .
O921  1.0066(16) 0.6321(11) 0.4412(8) 0.152(8) Uani 1 1 d U . .
N1  0.6968(7) 0.8498(4) 0.9253(4) 0.0239(16) Uani 1 1 d U . .
N2  0.7934(7) 0.7224(4) 0.8952(4) 0.0221(16) Uani 1 1 d U . .
N3  0.9390(8) 0.7252(4) 0.7876(4) 0.0232(16) Uani 1 1 d U . .
C2  0.6674(9) 0.7937(5) 0.9608(5) 0.024(2) Uani 1 1 d U . .
C8  0.9230(8) 0.6647(6) 0.8191(5) 0.027(2) Uani 1 1 d U . .
C11  0.6387(11) 0.9157(5) 0.9394(4) 0.0255(19) Uani 1 1 d U . .
C12  0.5315(10) 0.9312(6) 0.9051(6) 0.032(2) Uani 1 1 d U . .
C13  0.4747(11) 0.9958(6) 0.9202(5) 0.034(2) Uani 1 1 d U . .
C14  0.5198(11) 1.0451(6) 0.9664(5) 0.033(2) Uani 1 1 d U . .
C15  0.6238(10) 1.0266(6) 0.9989(5) 0.035(2) Uani 1 1 d U . .
C16  0.6828(10) 0.9637(6) 0.9860(5) 0.031(2) Uani 1 1 d U . .
C17  0.4770(10) 0.8809(6) 0.8576(6) 0.038(3) Uani 1 1 d U . .
C18  0.4541(13) 1.1136(7) 0.9802(7) 0.053(4) Uani 1 1 d U . .
C19  0.7936(11) 0.9443(7) 1.0248(6) 0.041(3) Uani 1 1 d U . .
C1  0.5740(11) 0.7980(6) 1.0158(6) 0.039(3) Uani 1 1 d U . .
C3  0.7214(9) 0.7252(6) 0.9489(5) 0.026(2) Uani 1 1 d U . .
C4  0.7006(10) 0.6615(7) 0.9900(5) 0.038(2) Uani 1 1 d U . .
C5  0.7602(10) 0.5996(6) 0.9744(6) 0.037(3) Uani 1 1 d U . .
C6  0.8362(12) 0.5936(5) 0.9175(6) 0.035(3) Uani 1 1 d U . .
C7  0.8502(9) 0.6619(5) 0.8782(4) 0.0239(16) Uani 1 1 d U . .
C9  0.9792(12) 0.5942(6) 0.7974(6) 0.041(3) Uani 1 1 d U . .
C51  1.0106(10) 0.7234(5) 0.7274(6) 0.027(2) Uani 1 1 d U . .
C52  0.9566(9) 0.7162(5) 0.6645(7) 0.032(2) Uani 1 1 d U . .
C53  1.0282(12) 0.7138(6) 0.6069(6) 0.037(2) Uani 1 1 d U . .
C54  1.1491(15) 0.7215(6) 0.6115(6) 0.042(3) Uani 1 1 d U . .
C55  1.2013(10) 0.7286(5) 0.6733(7) 0.037(2) Uani 1 1 d U . .
C56  1.1349(12) 0.7290(5) 0.7321(5) 0.033(2) Uani 1 1 d U . .
C57  0.8251(10) 0.7054(6) 0.6589(7) 0.047(3) Uani 1 1 d U . .
C58  1.2241(13) 0.7177(7) 0.5479(7) 0.054(4) Uani 1 1 d U . .
C59  1.1924(10) 0.7337(8) 0.8007(6) 0.045(3) Uani 1 1 d U . .
C61  0.8474(11) 0.9542(5) 0.7433(5) 0.0270(17) Uani 1 1 d U . .
C62  0.8463(11) 0.9878(5) 0.8073(5) 0.0289(17) Uani 1 1 d U . .
C63  0.9580(9) 0.9774(5) 0.8357(6) 0.0300(17) Uani 1 1 d U . .
C64  1.0264(9) 0.9370(6) 0.7896(6) 0.0273(18) Uani 1 1 d U . .
C65  0.9567(9) 0.9241(5) 0.7328(5) 0.0201(16) Uani 1 1 d U . .
C71  0.7485(12) 0.9596(8) 0.6929(7) 0.062(4) Uani 1 1 d U . .
C72  0.7472(12) 1.0355(6) 0.8295(10) 0.064(4) Uani 1 1 d U . .
C73  1.0017(16) 1.0084(8) 0.9019(7) 0.066(5) Uani 1 1 d U . .
C74  1.1556(11) 0.9223(7) 0.7992(7) 0.056(4) Uani 1 1 d U . .
C75  1.0004(12) 0.8929(6) 0.6682(7) 0.052(3) Uani 1 1 d U . .
C912  1.006(2) 0.8353(19) 0.1762(15) 0.185(14) Uani 1 1 d U . .
C913  0.980(3) 0.8185(10) 0.2373(13) 0.141(10) Uani 1 1 d U . .
C914  1.0334(17) 0.8594(12) 0.2801(11) 0.105(6) Uani 1 1 d U . .
C915  1.087(2) 0.9229(12) 0.2442(14) 0.120(7) Uani 1 1 d U . .
C922  1.0133(15) 0.6710(11) 0.3805(11) 0.092(5) Uani 1 1 d U . .
C923  0.9347(13) 0.6291(7) 0.3344(9) 0.064(3) Uani 1 1 d U . .
C924  0.8444(16) 0.5976(8) 0.3791(7) 0.060(3) Uani 1 1 d U . .
C925  0.9101(17) 0.5861(11) 0.4433(10) 0.089(6) Uani 1 1 d U . .
H13  0.4024 1.0067 0.8980 0.040 Uiso 1 1 calc R . .
H15  0.6556 1.0587 1.0314 0.043 Uiso 1 1 calc R . .
H32  0.6469 0.6628 1.0267 0.045 Uiso 1 1 calc R . .
H33  0.7503 0.5590 1.0027 0.044 Uiso 1 1 calc R . .
H34  0.8747 0.5501 0.9054 0.042 Uiso 1 1 calc R . .
H53  0.9929 0.7068 0.5640 0.044 Uiso 1 1 calc R . .
H55  1.2848 0.7333 0.6760 0.045 Uiso 1 1 calc R . .
H17A  0.4410 0.8411 0.8825 0.057 Uiso 1 1 calc R . .
H17B  0.5377 0.8621 0.8271 0.057 Uiso 1 1 calc R . .
H17C  0.4161 0.9058 0.8314 0.057 Uiso 1 1 calc R . .
H18A  0.4152 1.1299 0.9389 0.079 Uiso 1 1 calc R . .
H18B  0.5097 1.1503 0.9957 0.079 Uiso 1 1 calc R . .
H18C  0.3944 1.1051 1.0151 0.079 Uiso 1 1 calc R . .
H19A  0.7730 0.9119 1.0619 0.062 Uiso 1 1 calc R . .
H19B  0.8296 0.9880 1.0430 0.062 Uiso 1 1 calc R . .
H19C  0.8497 0.9204 0.9947 0.062 Uiso 1 1 calc R . .
H21A  0.5885 0.8405 1.0437 0.059 Uiso 1 1 calc R . .
H21B  0.5779 0.7549 1.0439 0.059 Uiso 1 1 calc R . .
H21C  0.4955 0.8015 0.9952 0.059 Uiso 1 1 calc R . .
H41A  1.0195 0.6009 0.7541 0.062 Uiso 1 1 calc R . .
H41B  0.9176 0.5575 0.7926 0.062 Uiso 1 1 calc R . .
H41C  1.0365 0.5788 0.8314 0.062 Uiso 1 1 calc R . .
H57A  0.7851 0.7330 0.6943 0.070 Uiso 1 1 calc R . .
H57B  0.8065 0.6544 0.6641 0.070 Uiso 1 1 calc R . .
H57C  0.7980 0.7220 0.6147 0.070 Uiso 1 1 calc R . .
H58A  1.1910 0.6816 0.5174 0.081 Uiso 1 1 calc R . .
H58B  1.3052 0.7044 0.5599 0.081 Uiso 1 1 calc R . .
H58C  1.2242 0.7646 0.5257 0.081 Uiso 1 1 calc R . .
H59A  1.2035 0.6852 0.8189 0.067 Uiso 1 1 calc R . .
H59B  1.1416 0.7614 0.8311 0.067 Uiso 1 1 calc R . .
H59C  1.2693 0.7575 0.7966 0.067 Uiso 1 1 calc R . .
H71A  0.7633 0.9263 0.6556 0.093 Uiso 1 1 calc R . .
H71B  0.7442 1.0087 0.6755 0.093 Uiso 1 1 calc R . .
H71C  0.6735 0.9472 0.7148 0.093 Uiso 1 1 calc R . .
H72A  0.7522 1.0431 0.8783 0.095 Uiso 1 1 calc R . .
H72B  0.6714 1.0129 0.8184 0.095 Uiso 1 1 calc R . .
H72C  0.7532 1.0819 0.8063 0.095 Uiso 1 1 calc R . .
H73A  0.9372 1.0343 0.9240 0.099 Uiso 1 1 calc R . .
H73B  1.0673 1.0414 0.8931 0.099 Uiso 1 1 calc R . .
H73C  1.0289 0.9694 0.9311 0.099 Uiso 1 1 calc R . .
H74A  1.1792 0.8819 0.7706 0.084 Uiso 1 1 calc R . .
H74B  1.1707 0.9105 0.8465 0.084 Uiso 1 1 calc R . .
H74C  1.2012 0.9650 0.7867 0.084 Uiso 1 1 calc R . .
H75A  0.9419 0.8589 0.6506 0.077 Uiso 1 1 calc R . .
H75B  1.0753 0.8678 0.6762 0.077 Uiso 1 1 calc R . .
H75C  1.0129 0.9314 0.6354 0.077 Uiso 1 1 calc R . .
H91A  0.9366 0.8263 0.1468 0.222 Uiso 1 1 calc R . .
H91B  1.0719 0.8050 0.1603 0.222 Uiso 1 1 calc R . .
H91C  1.0023 0.7679 0.2456 0.169 Uiso 1 1 calc R . .
H91D  0.8932 0.8227 0.2439 0.169 Uiso 1 1 calc R . .
H91E  1.0965 0.8319 0.3031 0.126 Uiso 1 1 calc R . .
H91F  0.9766 0.8762 0.3146 0.126 Uiso 1 1 calc R . .
H91G  1.1740 0.9210 0.2457 0.144 Uiso 1 1 calc R . .
H91H  1.0596 0.9685 0.2647 0.144 Uiso 1 1 calc R . .
H92A  1.0954 0.6725 0.3633 0.110 Uiso 1 1 calc R . .
H92B  0.9841 0.7206 0.3865 0.110 Uiso 1 1 calc R . .
H92C  0.8978 0.6609 0.3004 0.077 Uiso 1 1 calc R . .
H92D  0.9797 0.5911 0.3109 0.077 Uiso 1 1 calc R . .
H92E  0.8143 0.5517 0.3608 0.072 Uiso 1 1 calc R . .
H92F  0.7773 0.6310 0.3857 0.072 Uiso 1 1 calc R . .
H92G  0.8592 0.5973 0.4825 0.107 Uiso 1 1 calc R . .
H92H  0.9367 0.5356 0.4469 0.107 Uiso 1 1 calc R . .

loop_
_atom_site_aniso_label
_atom_site_aniso_U_11
_atom_site_aniso_U_22
_atom_site_aniso_U_33
_atom_site_aniso_U_12
_atom_site_aniso_U_13
_atom_site_aniso_U_23
U1 0.02076(14) 0.01584(13) 0.02036(14) 0.00006(17) 0.00063(17) 0.00240(16)
O1 0.025(3) 0.021(3) 0.029(3) -0.002(3) -0.003(3) 0.006(3)
O2 0.024(3) 0.024(4) 0.022(3) -0.004(3) 0.001(3) -0.001(3)
O911 0.169(18) 0.22(2) 0.137(13) 0.026(15) 0.040(15) 0.035(16)
O921 0.148(14) 0.21(2) 0.097(10) -0.086(13) -0.051(10) 0.024(11)
N1 0.029(4) 0.021(4) 0.022(4) 0.002(3) 0.006(3) 0.006(3)
N2 0.023(4) 0.015(3) 0.028(4) 0.002(3) 0.001(3) 0.005(3)
N3 0.027(4) 0.019(3) 0.023(4) -0.003(3) 0.001(3) -0.005(3)
C2 0.023(6) 0.028(4) 0.022(5) 0.005(4) 0.009(4) 0.007(4)
C8 0.035(5) 0.014(4) 0.032(5) 0.001(5) 0.005(4) -0.003(4)
C11 0.038(5) 0.025(4) 0.014(4) 0.007(5) 0.006(4) 0.007(3)
C12 0.037(6) 0.025(5) 0.034(6) 0.005(4) 0.003(4) -0.007(4)
C13 0.037(6) 0.036(6) 0.028(6) 0.011(5) 0.005(5) 0.007(4)
C14 0.045(6) 0.028(5) 0.027(6) 0.007(5) 0.018(5) 0.004(4)
C15 0.047(7) 0.032(5) 0.028(5) 0.008(5) 0.015(5) -0.003(4)
C16 0.040(6) 0.027(5) 0.026(5) 0.002(4) 0.006(4) 0.002(4)
C17 0.036(6) 0.036(6) 0.042(7) -0.010(5) -0.007(5) -0.004(5)
C18 0.061(9) 0.042(7) 0.055(9) 0.022(6) 0.008(7) 0.001(6)
C19 0.042(7) 0.039(7) 0.043(7) 0.004(5) -0.002(5) -0.005(6)
C1 0.051(7) 0.030(6) 0.038(7) 0.004(5) 0.023(5) 0.009(5)
C3 0.027(6) 0.024(4) 0.026(5) 0.002(4) 0.005(4) 0.007(4)
C4 0.052(6) 0.029(5) 0.032(5) 0.002(5) 0.010(5) 0.021(5)
C5 0.036(6) 0.024(5) 0.051(7) -0.005(5) 0.008(5) 0.019(5)
C6 0.045(7) 0.020(4) 0.040(6) 0.003(5) 0.000(5) 0.015(4)
C7 0.023(4) 0.017(3) 0.032(4) -0.007(5) 0.003(4) -0.003(4)
C9 0.060(8) 0.020(5) 0.044(7) 0.000(5) 0.026(6) -0.004(5)
C51 0.033(5) 0.018(5) 0.030(4) 0.008(4) 0.005(4) 0.007(4)
C52 0.041(5) 0.025(5) 0.030(4) 0.002(4) 0.004(5) -0.003(5)
C53 0.053(6) 0.029(6) 0.028(5) 0.009(6) 0.009(5) -0.003(5)
C54 0.053(6) 0.027(5) 0.045(5) 0.008(7) 0.022(6) -0.011(5)
C55 0.034(5) 0.027(5) 0.051(5) -0.001(4) 0.017(5) -0.008(6)
C56 0.041(5) 0.024(5) 0.034(5) 0.009(6) 0.004(4) 0.007(4)
C57 0.047(6) 0.058(7) 0.035(6) -0.009(6) 0.001(5) -0.020(6)
C58 0.067(9) 0.046(8) 0.049(7) 0.009(7) 0.026(7) -0.005(6)
C59 0.025(6) 0.061(9) 0.048(6) 0.014(6) 0.000(5) -0.002(7)
C61 0.024(4) 0.021(4) 0.036(4) 0.002(4) -0.006(4) 0.013(3)
C62 0.027(4) 0.020(3) 0.039(4) 0.002(4) 0.020(4) 0.011(3)
C63 0.048(5) 0.015(3) 0.027(4) -0.010(3) -0.005(4) 0.004(4)
C64 0.017(4) 0.030(5) 0.035(5) -0.001(3) -0.004(3) 0.016(4)
C65 0.024(4) 0.015(4) 0.022(4) 0.002(3) 0.005(3) 0.005(3)
C71 0.041(7) 0.078(10) 0.067(8) -0.015(7) -0.022(7) 0.043(7)
C72 0.064(8) 0.027(6) 0.099(11) 0.023(6) 0.037(10) 0.016(8)
C73 0.113(13) 0.046(8) 0.039(7) -0.035(8) -0.018(7) 0.003(6)
C74 0.020(4) 0.054(7) 0.094(10) -0.009(6) -0.007(6) 0.033(7)
C75 0.091(10) 0.024(5) 0.040(6) -0.003(6) 0.035(7) -0.007(6)
C912 0.121(18) 0.27(2) 0.163(16) -0.10(2) 0.104(17) -0.14(2)
C913 0.23(3) 0.050(11) 0.145(18) 0.011(11) -0.078(17) -0.017(11)
C914 0.071(12) 0.109(16) 0.135(13) 0.017(11) -0.041(12) -0.011(10)
C915 0.084(15) 0.088(13) 0.19(2) 0.005(10) -0.021(16) -0.031(13)
C922 0.064(10) 0.075(13) 0.136(14) -0.014(8) 0.012(10) 0.008(10)
C923 0.073(9) 0.059(8) 0.061(7) 0.031(6) 0.014(7) 0.001(7)
C924 0.063(8) 0.058(8) 0.059(8) -0.002(8) 0.002(7) -0.012(7)
C925 0.088(13) 0.098(14) 0.082(10) -0.001(9) -0.019(9) 0.035(11)

# 10. MOLECULAR GEOMETRY


_geom_special_details
;
All esds (except the esd in the dihedral angle between two l.s. planes)
are estimated using the full covariance matrix.  The cell esds are taken
into account individually in the estimation of esds in distances, angles
and torsion angles; correlations between esds in cell parameters are only
used when they are defined by crystal symmetry.  An approximate (isotropic)
treatment of cell esds is used for estimating esds involving l.s. planes.
;


loop_
_geom_bond_atom_site_label_1
_geom_bond_atom_site_label_2
_geom_bond_distance
_geom_bond_site_symmetry_1
_geom_bond_site_symmetry_2
_geom_bond_publ_flag
U1 O1 1.791(6) . . ?
U1 O2 1.795(6) . . ?
U1 N1 2.514(8) . . ?
U1 N3 2.514(8) . . ?
U1 N2 2.555(8) . . ?
U1 C61 2.824(9) . . ?
U1 C62 2.839(9) . . ?
U1 C65 2.843(9) . . ?
U1 C64 2.847(10) . . ?
U1 C63 2.856(9) . . ?
O911 C915 1.53(3) . . ?
O911 C912 1.56(3) . . ?
O921 C925 1.39(2) . . ?
O921 C922 1.41(2) . . ?
N1 C2 1.304(12) . . ?
N1 C11 1.421(12) . . ?
N2 C7 1.341(13) . . ?
N2 C3 1.344(13) . . ?
N3 C8 1.301(13) . . ?
N3 C51 1.444(13) . . ?
C2 C3 1.433(14) . . ?
C2 C1 1.521(14) . . ?
C8 C7 1.435(12) . . ?
C8 C9 1.522(14) . . ?
C11 C16 1.380(15) . . ?
C11 C12 1.421(16) . . ?
C12 C13 1.397(15) . . ?
C12 C17 1.466(15) . . ?
C13 C14 1.394(16) . . ?
C13 H13 0.9500 . . ?
C14 C15 1.386(17) . . ?
C14 C18 1.502(16) . . ?
C15 C16 1.372(14) . . ?
C15 H15 0.9500 . . ?
C16 C19 1.515(16) . . ?
C17 H17A 0.9800 . . ?
C17 H17B 0.9800 . . ?
C17 H17C 0.9800 . . ?
C18 H18A 0.9800 . . ?
C18 H18B 0.9800 . . ?
C18 H18C 0.9800 . . ?
C19 H19A 0.9800 . . ?
C19 H19B 0.9800 . . ?
C19 H19C 0.9800 . . ?
C1 H21A 0.9800 . . ?
C1 H21B 0.9800 . . ?
C1 H21C 0.9800 . . ?
C3 C4 1.459(14) . . ?
C4 C5 1.371(16) . . ?
C4 H32 0.9500 . . ?
C5 C6 1.425(16) . . ?
C5 H33 0.9500 . . ?
C6 C7 1.500(13) . . ?
C6 H34 0.9500 . . ?
C9 H41A 0.9800 . . ?
C9 H41B 0.9800 . . ?
C9 H41C 0.9800 . . ?
C51 C52 1.397(16) . . ?
C51 C56 1.412(17) . . ?
C52 C53 1.402(16) . . ?
C52 C57 1.505(15) . . ?
C53 C54 1.38(2) . . ?
C53 H53 0.9500 . . ?
C54 C55 1.367(19) . . ?
C54 C58 1.523(17) . . ?
C55 C56 1.388(16) . . ?
C55 H55 0.9500 . . ?
C56 C59 1.512(16) . . ?
C57 H57A 0.9800 . . ?
C57 H57B 0.9800 . . ?
C57 H57C 0.9800 . . ?
C58 H58A 0.9800 . . ?
C58 H58B 0.9800 . . ?
C58 H58C 0.9800 . . ?
C59 H59A 0.9800 . . ?
C59 H59B 0.9800 . . ?
C59 H59C 0.9800 . . ?
C61 C65 1.373(15) . . ?
C61 C62 1.416(14) . . ?
C61 C71 1.504(16) . . ?
C62 C63 1.398(16) . . ?
C62 C72 1.496(15) . . ?
C63 C64 1.416(16) . . ?
C63 C73 1.517(16) . . ?
C64 C65 1.397(14) . . ?
C64 C74 1.498(16) . . ?
C65 C75 1.492(15) . . ?
C71 H71A 0.9800 . . ?
C71 H71B 0.9800 . . ?
C71 H71C 0.9800 . . ?
C72 H72A 0.9800 . . ?
C72 H72B 0.9800 . . ?
C72 H72C 0.9800 . . ?
C73 H73A 0.9800 . . ?
C73 H73B 0.9800 . . ?
C73 H73C 0.9800 . . ?
C74 H74A 0.9800 . . ?
C74 H74B 0.9800 . . ?
C74 H74C 0.9800 . . ?
C75 H75A 0.9800 . . ?
C75 H75B 0.9800 . . ?
C75 H75C 0.9800 . . ?
C912 C913 1.29(3) . . ?
C912 H91A 0.9900 . . ?
C912 H91B 0.9900 . . ?
C913 C914 1.29(2) . . ?
C913 H91C 0.9900 . . ?
C913 H91D 0.9900 . . ?
C914 C915 1.51(3) . . ?
C914 H91E 0.9900 . . ?
C914 H91F 0.9900 . . ?
C915 H91G 0.9900 . . ?
C915 H91H 0.9900 . . ?
C922 C923 1.50(2) . . ?
C922 H92A 0.9900 . . ?
C922 H92B 0.9900 . . ?
C923 C924 1.47(2) . . ?
C923 H92C 0.9900 . . ?
C923 H92D 0.9900 . . ?
C924 C925 1.49(2) . . ?
C924 H92E 0.9900 . . ?
C924 H92F 0.9900 . . ?
C925 H92G 0.9900 . . ?
C925 H92H 0.9900 . . ?

loop_
_geom_angle_atom_site_label_1
_geom_angle_atom_site_label_2
_geom_angle_atom_site_label_3
_geom_angle
_geom_angle_site_symmetry_1
_geom_angle_site_symmetry_2
_geom_angle_site_symmetry_3
_geom_angle_publ_flag
O1 U1 O2 169.6(3) . . . ?
O1 U1 N1 89.3(3) . . . ?
O2 U1 N1 86.3(3) . . . ?
O1 U1 N3 88.8(3) . . . ?
O2 U1 N3 86.4(3) . . . ?
N1 U1 N3 127.7(3) . . . ?
O1 U1 N2 81.0(3) . . . ?
O2 U1 N2 88.6(3) . . . ?
N1 U1 N2 63.8(3) . . . ?
N3 U1 N2 64.3(3) . . . ?
O1 U1 C61 118.3(3) . . . ?
O2 U1 C61 72.2(3) . . . ?
N1 U1 C61 112.6(3) . . . ?
N3 U1 C61 114.0(3) . . . ?
N2 U1 C61 160.7(3) . . . ?
O1 U1 C62 99.2(3) . . . ?
O2 U1 C62 90.5(3) . . . ?
N1 U1 C62 92.4(3) . . . ?
N3 U1 C62 139.4(3) . . . ?
N2 U1 C62 156.2(3) . . . ?
C61 U1 C62 29.0(3) . . . ?
O1 U1 C65 102.3(3) . . . ?
O2 U1 C65 87.1(3) . . . ?
N1 U1 C65 138.9(3) . . . ?
N3 U1 C65 92.3(3) . . . ?
N2 U1 C65 156.4(3) . . . ?
C61 U1 C65 28.0(3) . . . ?
C62 U1 C65 47.1(3) . . . ?
O1 U1 C64 74.8(3) . . . ?
O2 U1 C64 115.1(3) . . . ?
N1 U1 C64 130.9(3) . . . ?
N3 U1 C64 98.6(3) . . . ?
N2 U1 C64 150.7(3) . . . ?
C61 U1 C64 46.7(3) . . . ?
C62 U1 C64 47.2(3) . . . ?
C65 U1 C64 28.4(3) . . . ?
O1 U1 C63 72.9(3) . . . ?
O2 U1 C63 117.3(3) . . . ?
N1 U1 C63 102.3(3) . . . ?
N3 U1 C63 126.6(3) . . . ?
N2 U1 C63 150.8(3) . . . ?
C61 U1 C63 46.9(3) . . . ?
C62 U1 C63 28.4(3) . . . ?
C65 U1 C63 47.0(3) . . . ?
C64 U1 C63 28.7(3) . . . ?
C915 O911 C912 96(2) . . . ?
C925 O921 C922 112.8(15) . . . ?
C2 N1 C11 117.9(8) . . . ?
C2 N1 U1 119.7(6) . . . ?
C11 N1 U1 122.3(6) . . . ?
C7 N2 C3 121.5(8) . . . ?
C7 N2 U1 118.1(6) . . . ?
C3 N2 U1 119.6(6) . . . ?
C8 N3 C51 117.2(8) . . . ?
C8 N3 U1 119.5(6) . . . ?
C51 N3 U1 123.3(6) . . . ?
N1 C2 C3 121.0(9) . . . ?
N1 C2 C1 121.5(9) . . . ?
C3 C2 C1 117.5(9) . . . ?
N3 C8 C7 120.4(9) . . . ?
N3 C8 C9 123.6(8) . . . ?
C7 C8 C9 116.1(9) . . . ?
C16 C11 N1 121.7(10) . . . ?
C16 C11 C12 119.8(9) . . . ?
N1 C11 C12 118.5(9) . . . ?
C13 C12 C11 117.8(10) . . . ?
C13 C12 C17 119.7(11) . . . ?
C11 C12 C17 122.4(10) . . . ?
C14 C13 C12 122.7(11) . . . ?
C14 C13 H13 118.70 . . . ?
C12 C13 H13 118.70 . . . ?
C15 C14 C13 117.0(10) . . . ?
C15 C14 C18 123.1(11) . . . ?
C13 C14 C18 119.9(12) . . . ?
C16 C15 C14 122.5(11) . . . ?
C16 C15 H15 118.70 . . . ?
C14 C15 H15 118.70 . . . ?
C15 C16 C11 120.2(11) . . . ?
C15 C16 C19 120.7(11) . . . ?
C11 C16 C19 119.0(10) . . . ?
C12 C17 H17A 109.50 . . . ?
C12 C17 H17B 109.50 . . . ?
H17A C17 H17B 109.50 . . . ?
C12 C17 H17C 109.50 . . . ?
H17A C17 H17C 109.50 . . . ?
H17B C17 H17C 109.50 . . . ?
C14 C18 H18A 109.50 . . . ?
C14 C18 H18B 109.50 . . . ?
H18A C18 H18B 109.50 . . . ?
C14 C18 H18C 109.50 . . . ?
H18A C18 H18C 109.50 . . . ?
H18B C18 H18C 109.50 . . . ?
C16 C19 H19A 109.50 . . . ?
C16 C19 H19B 109.50 . . . ?
H19A C19 H19B 109.50 . . . ?
C16 C19 H19C 109.50 . . . ?
H19A C19 H19C 109.50 . . . ?
H19B C19 H19C 109.50 . . . ?
C2 C1 H21A 109.50 . . . ?
C2 C1 H21B 109.50 . . . ?
H21A C1 H21B 109.50 . . . ?
C2 C1 H21C 109.50 . . . ?
H21A C1 H21C 109.50 . . . ?
H21B C1 H21C 109.50 . . . ?
N2 C3 C2 115.1(9) . . . ?
N2 C3 C4 120.6(9) . . . ?
C2 C3 C4 124.3(10) . . . ?
C5 C4 C3 118.6(9) . . . ?
C5 C4 H32 120.70 . . . ?
C3 C4 H32 120.70 . . . ?
C4 C5 C6 122.8(10) . . . ?
C4 C5 H33 118.60 . . . ?
C6 C5 H33 118.60 . . . ?
C5 C6 C7 114.1(9) . . . ?
C5 C6 H34 122.90 . . . ?
C7 C6 H34 122.90 . . . ?
N2 C7 C8 116.7(9) . . . ?
N2 C7 C6 122.2(9) . . . ?
C8 C7 C6 121.1(10) . . . ?
C8 C9 H41A 109.50 . . . ?
C8 C9 H41B 109.50 . . . ?
H41A C9 H41B 109.50 . . . ?
C8 C9 H41C 109.50 . . . ?
H41A C9 H41C 109.50 . . . ?
H41B C9 H41C 109.50 . . . ?
C52 C51 C56 120.1(10) . . . ?
C52 C51 N3 119.8(10) . . . ?
C56 C51 N3 120.1(10) . . . ?
C51 C52 C53 118.6(10) . . . ?
C51 C52 C57 120.7(11) . . . ?
C53 C52 C57 120.5(12) . . . ?
C54 C53 C52 121.1(11) . . . ?
C54 C53 H53 119.50 . . . ?
C52 C53 H53 119.50 . . . ?
C55 C54 C53 119.9(11) . . . ?
C55 C54 C58 120.5(14) . . . ?
C53 C54 C58 119.5(12) . . . ?
C54 C55 C56 121.4(11) . . . ?
C54 C55 H55 119.30 . . . ?
C56 C55 H55 119.30 . . . ?
C55 C56 C51 118.8(11) . . . ?
C55 C56 C59 121.7(12) . . . ?
C51 C56 C59 119.5(10) . . . ?
C52 C57 H57A 109.50 . . . ?
C52 C57 H57B 109.50 . . . ?
H57A C57 H57B 109.50 . . . ?
C52 C57 H57C 109.50 . . . ?
H57A C57 H57C 109.50 . . . ?
H57B C57 H57C 109.50 . . . ?
C54 C58 H58A 109.50 . . . ?
C54 C58 H58B 109.50 . . . ?
H58A C58 H58B 109.50 . . . ?
C54 C58 H58C 109.50 . . . ?
H58A C58 H58C 109.50 . . . ?
H58B C58 H58C 109.50 . . . ?
C56 C59 H59A 109.50 . . . ?
C56 C59 H59B 109.50 . . . ?
H59A C59 H59B 109.50 . . . ?
C56 C59 H59C 109.50 . . . ?
H59A C59 H59C 109.50 . . . ?
H59B C59 H59C 109.50 . . . ?
C65 C61 C62 109.0(10) . . . ?
C65 C61 C71 126.5(11) . . . ?
C62 C61 C71 124.1(11) . . . ?
C65 C61 U1 76.8(5) . . . ?
C62 C61 U1 76.1(5) . . . ?
C71 C61 U1 119.4(7) . . . ?
C63 C62 C61 107.0(10) . . . ?
C63 C62 C72 129.8(12) . . . ?
C61 C62 C72 122.3(12) . . . ?
C63 C62 U1 76.5(5) . . . ?
C61 C62 U1 74.9(5) . . . ?
C72 C62 U1 122.7(7) . . . ?
C62 C63 C64 107.9(10) . . . ?
C62 C63 C73 126.3(11) . . . ?
C64 C63 C73 125.7(11) . . . ?
C62 C63 U1 75.1(5) . . . ?
C64 C63 U1 75.3(5) . . . ?
C73 C63 U1 119.2(8) . . . ?
C65 C64 C63 107.8(9) . . . ?
C65 C64 C74 128.4(11) . . . ?
C63 C64 C74 123.2(11) . . . ?
C65 C64 U1 75.6(6) . . . ?
C63 C64 U1 76.0(6) . . . ?
C74 C64 U1 121.3(7) . . . ?
C61 C65 C64 108.3(9) . . . ?
C61 C65 C75 126.0(10) . . . ?
C64 C65 C75 125.0(10) . . . ?
C61 C65 U1 75.2(5) . . . ?
C64 C65 U1 75.9(6) . . . ?
C75 C65 U1 122.2(6) . . . ?
C61 C71 H71A 109.50 . . . ?
C61 C71 H71B 109.50 . . . ?
H71A C71 H71B 109.50 . . . ?
C61 C71 H71C 109.50 . . . ?
H71A C71 H71C 109.50 . . . ?
H71B C71 H71C 109.50 . . . ?
C62 C72 H72A 109.50 . . . ?
C62 C72 H72B 109.50 . . . ?
H72A C72 H72B 109.50 . . . ?
C62 C72 H72C 109.50 . . . ?
H72A C72 H72C 109.50 . . . ?
H72B C72 H72C 109.50 . . . ?
C63 C73 H73A 109.50 . . . ?
C63 C73 H73B 109.50 . . . ?
H73A C73 H73B 109.50 . . . ?
C63 C73 H73C 109.50 . . . ?
H73A C73 H73C 109.50 . . . ?
H73B C73 H73C 109.50 . . . ?
C64 C74 H74A 109.50 . . . ?
C64 C74 H74B 109.50 . . . ?
H74A C74 H74B 109.50 . . . ?
C64 C74 H74C 109.50 . . . ?
H74A C74 H74C 109.50 . . . ?
H74B C74 H74C 109.50 . . . ?
C65 C75 H75A 109.50 . . . ?
C65 C75 H75B 109.50 . . . ?
H75A C75 H75B 109.50 . . . ?
C65 C75 H75C 109.50 . . . ?
H75A C75 H75C 109.50 . . . ?
H75B C75 H75C 109.50 . . . ?
C913 C912 O911 110(2) . . . ?
C913 C912 H91A 109.50 . . . ?
O911 C912 H91A 109.50 . . . ?
C913 C912 H91B 109.60 . . . ?
O911 C912 H91B 109.60 . . . ?
H91A C912 H91B 108.10 . . . ?
C912 C913 C914 112(3) . . . ?
C912 C913 H91C 109.30 . . . ?
C914 C913 H91C 109.30 . . . ?
C912 C913 H91D 109.30 . . . ?
C914 C913 H91D 109.30 . . . ?
H91C C913 H91D 108.00 . . . ?
C913 C914 C915 110(2) . . . ?
C913 C914 H91E 109.70 . . . ?
C915 C914 H91E 109.70 . . . ?
C913 C914 H91F 109.70 . . . ?
C915 C914 H91F 109.70 . . . ?
H91E C914 H91F 108.20 . . . ?
C914 C915 O911 104.2(18) . . . ?
C914 C915 H91G 110.90 . . . ?
O911 C915 H91G 110.90 . . . ?
C914 C915 H91H 110.90 . . . ?
O911 C915 H91H 110.90 . . . ?
H91G C915 H91H 108.90 . . . ?
O921 C922 C923 102.9(15) . . . ?
O921 C922 H92A 111.20 . . . ?
C923 C922 H92A 111.20 . . . ?
O921 C922 H92B 111.20 . . . ?
C923 C922 H92B 111.20 . . . ?
H92A C922 H92B 109.10 . . . ?
C924 C923 C922 104.5(14) . . . ?
C924 C923 H92C 110.90 . . . ?
C922 C923 H92C 110.90 . . . ?
C924 C923 H92D 110.90 . . . ?
C922 C923 H92D 110.90 . . . ?
H92C C923 H92D 108.90 . . . ?
C923 C924 C925 103.1(15) . . . ?
C923 C924 H92E 111.10 . . . ?
C925 C924 H92E 111.10 . . . ?
C923 C924 H92F 111.10 . . . ?
C925 C924 H92F 111.10 . . . ?
H92E C924 H92F 109.10 . . . ?
O921 C925 C924 106.0(15) . . . ?
O921 C925 H92G 110.50 . . . ?
C924 C925 H92G 110.50 . . . ?
O921 C925 H92H 110.50 . . . ?
C924 C925 H92H 110.50 . . . ?
H92G C925 H92H 108.70 . . . ?

loop_
_geom_torsion_atom_site_label_1                                                
_geom_torsion_atom_site_label_2                                        
_geom_torsion_atom_site_label_3                                        
_geom_torsion_atom_site_label_4                                        
_geom_torsion                                                          
_geom_torsion_site_symmetry_1                                          
_geom_torsion_site_symmetry_2                                          
_geom_torsion_site_symmetry_3                                          
_geom_torsion_site_symmetry_4                                          
_geom_torsion_publ_flag                                                
O1 U1 N1 C2 -76.5(8) . . . . ?                                          
O2 U1 N1 C2 94.0(8) . . . . ?                                           
N3 U1 N1 C2 11.5(9) . . . . ?                                           
N2 U1 N1 C2 3.8(7) . . . . ?                                            
C61 U1 N1 C2 163.0(7) . . . . ?                                         
C62 U1 N1 C2 -175.7(8) . . . . ?                                        
C65 U1 N1 C2 175.4(7) . . . . ?                                         
C64 U1 N1 C2 -145.5(7) . . . . ?                                        
C63 U1 N1 C2 -148.8(8) . . . . ?                                        
O1 U1 N1 C11 103.8(8) . . . . ?                                         
O2 U1 N1 C11 -85.7(8) . . . . ?                                         
N3 U1 N1 C11 -168.3(7) . . . . ?                                        
N2 U1 N1 C11 -175.9(9) . . . . ?                                        
C61 U1 N1 C11 -16.7(8) . . . . ?                                        
C62 U1 N1 C11 4.6(8) . . . . ?                                          
C65 U1 N1 C11 -4.3(10) . . . . ?                                        
C64 U1 N1 C11 34.8(9) . . . . ?                                         
C63 U1 N1 C11 31.5(8) . . . . ?                                         
O1 U1 N2 C7 -83.7(7) . . . . ?                                         
O2 U1 N2 C7 96.0(7) . . . . ?                                          
N1 U1 N2 C7 -177.4(8) . . . . ?                                        
N3 U1 N2 C7 9.3(7) . . . . ?                                           
C61 U1 N2 C7 98.7(10) . . . . ?                                        
C62 U1 N2 C7 -176.2(8) . . . . ?                                       
C65 U1 N2 C7 16.5(12) . . . . ?                                        
C64 U1 N2 C7 -49.4(10) . . . . ?                                       
C63 U1 N2 C7 -110.5(8) . . . . ?                                       
O1 U1 N2 C3 86.3(8) . . . . ?                                          
O2 U1 N2 C3 -94.0(8) . . . . ?                                         
N1 U1 N2 C3 -7.4(7) . . . . ?                                          
N3 U1 N2 C3 179.3(8) . . . . ?                                         
C61 U1 N2 C3 -91.2(11) . . . . ?                                       
C62 U1 N2 C3 -6.1(12) . . . . ?                                        
C65 U1 N2 C3 -173.5(7) . . . . ?                                       
C64 U1 N2 C3 120.6(8) . . . . ?                                        
C63 U1 N2 C3 59.6(10) . . . . ?                                        
O1 U1 N3 C8 74.1(8) . . . . ?                                           
O2 U1 N3 C8 -96.7(8) . . . . ?                                          
N1 U1 N3 C8 -14.1(9) . . . . ?                                          
N2 U1 N3 C8 -6.5(7) . . . . ?                                           
C61 U1 N3 C8 -165.3(7) . . . . ?                                        
C62 U1 N3 C8 176.8(7) . . . . ?                                         
C65 U1 N3 C8 176.3(8) . . . . ?                                         
C64 U1 N3 C8 148.5(7) . . . . ?                                         
C63 U1 N3 C8 141.6(7) . . . . ?                                         
O1 U1 N3 C51 -103.9(8) . . . . ?                                        
O2 U1 N3 C51 85.4(8) . . . . ?                                          
N1 U1 N3 C51 168.0(7) . . . . ?                                         
N2 U1 N3 C51 175.5(9) . . . . ?                                         
C61 U1 N3 C51 16.7(9) . . . . ?                                         
C62 U1 N3 C51 -1.1(10) . . . . ?                                        
C65 U1 N3 C51 -1.6(8) . . . . ?                                         
C64 U1 N3 C51 -29.4(8) . . . . ?                                        
C63 U1 N3 C51 -36.4(9) . . . . ?                                        
C11 N1 C2 C3 179.3(10) . . . . ?                                       
U1 N1 C2 C3 -0.4(13) . . . . ?                                         
C11 N1 C2 C1 0.0(15) . . . . ?                                         
U1 N1 C2 C1 -179.8(8) . . . . ?                                        
C51 N3 C8 C7 -178.2(9) . . . . ?                                       
U1 N3 C8 C7 3.7(12) . . . . ?                                          
C51 N3 C8 C9 2.4(15) . . . . ?                                         
U1 N3 C8 C9 -175.7(8) . . . . ?                                        
C2 N1 C11 C16 90.2(13) . . . . ?                                        
U1 N1 C11 C16 -90.1(10) . . . . ?                                       
C2 N1 C11 C12 -88.6(12) . . . . ?                                       
U1 N1 C11 C12 91.1(11) . . . . ?                                        
C16 C11 C12 C13 0.4(16) . . . . ?                                       
N1 C11 C12 C13 179.2(9) . . . . ?                                       
C16 C11 C12 C17 -176.9(10) . . . . ?                                    
N1 C11 C12 C17 2.0(16) . . . . ?                                        
C11 C12 C13 C14 0.7(17) . . . . ?                                       
C17 C12 C13 C14 178.0(10) . . . . ?                                     
C12 C13 C14 C15 -1.5(16) . . . . ?                                      
C12 C13 C14 C18 -180.0(11) . . . . ?                                    
C13 C14 C15 C16 1.4(16) . . . . ?                                       
C18 C14 C15 C16 179.7(11) . . . . ?                                     
C14 C15 C16 C11 -0.3(17) . . . . ?                                      
C14 C15 C16 C19 -177.5(10) . . . . ?                                    
N1 C11 C16 C15 -179.4(9) . . . . ?                                      
C12 C11 C16 C15 -0.5(16) . . . . ?                                      
N1 C11 C16 C19 -2.2(15) . . . . ?                                       
C12 C11 C16 C19 176.6(10) . . . . ?                                     
C7 N2 C3 C2 179.7(9) . . . . ?                                        
U1 N2 C3 C2 10.0(12) . . . . ?                                         
C7 N2 C3 C4 -1.4(16) . . . . ?                                       
U1 N2 C3 C4 -171.1(8) . . . . ?                                       
N1 C2 C3 N2 -6.4(15) . . . . ?                                         
C1 C2 C3 N2 172.9(10) . . . . ?                                       
N1 C2 C3 C4 174.7(10) . . . . ?                                       
C1 C2 C3 C4 -5.9(17) . . . . ?                                       
N2 C3 C4 C5 2.9(17) . . . . ?                                        
C2 C3 C4 C5 -178.3(11) . . . . ?                                     
C3 C4 C5 C6 -3.8(19) . . . . ?                                      
C4 C5 C6 C7 3.0(18) . . . . ?                                       
C3 N2 C7 C8 178.9(9) . . . . ?                                        
U1 N2 C7 C8 -11.3(11) . . . . ?                                        
C3 N2 C7 C6 0.6(16) . . . . ?                                        
U1 N2 C7 C6 170.5(7) . . . . ?                                        
N3 C8 C7 N2 5.2(14) . . . . ?                                          
C9 C8 C7 N2 -175.3(10) . . . . ?                                      
N3 C8 C7 C6 -176.5(10) . . . . ?                                      
C9 C8 C7 C6 2.9(14) . . . . ?                                        
C5 C6 C7 N2 -1.3(16) . . . . ?                                       
C5 C6 C7 C8 -179.5(10) . . . . ?                                     
C8 N3 C51 C52 94.3(12) . . . . ?                                        
U1 N3 C51 C52 -87.7(10) . . . . ?                                       
C8 N3 C51 C56 -85.6(12) . . . . ?                                       
U1 N3 C51 C56 92.4(10) . . . . ?                                        
C56 C51 C52 C53 0.7(14) . . . . ?                                       
N3 C51 C52 C53 -179.2(10) . . . . ?                                     
C56 C51 C52 C57 176.1(10) . . . . ?                                     
N3 C51 C52 C57 -3.8(15) . . . . ?                                       
C51 C52 C53 C54 -2.7(15) . . . . ?                                      
C57 C52 C53 C54 -178.1(10) . . . . ?                                    
C52 C53 C54 C55 2.8(17) . . . . ?                                       
C52 C53 C54 C58 179.3(10) . . . . ?                                     
C53 C54 C55 C56 -0.7(16) . . . . ?                                      
C58 C54 C55 C56 -177.2(11) . . . . ?                                    
C54 C55 C56 C51 -1.3(15) . . . . ?                                      
C54 C55 C56 C59 177.4(11) . . . . ?                                     
C52 C51 C56 C55 1.3(15) . . . . ?                                       
N3 C51 C56 C55 -178.8(9) . . . . ?                                      
C52 C51 C56 C59 -177.4(10) . . . . ?                                    
N3 C51 C56 C59 2.5(15) . . . . ?                                        
O1 U1 C61 C65 60.4(7) . . . . ?                                         
O2 U1 C61 C65 -119.5(6) . . . . ?                                       
N1 U1 C61 C65 162.5(6) . . . . ?                                        
N3 U1 C61 C65 -41.9(7) . . . . ?                                        
N2 U1 C61 C65 -122.4(9) . . . . ?                                       
C62 U1 C61 C65 113.7(10) . . . . ?                                      
C64 U1 C61 C65 36.8(6) . . . . ?                                        
C63 U1 C61 C65 76.6(7) . . . . ?                                        
O1 U1 C61 C62 -53.4(8) . . . . ?                                        
O2 U1 C61 C62 126.8(8) . . . . ?                                        
N1 U1 C61 C62 48.7(8) . . . . ?                                         
N3 U1 C61 C62 -155.7(7) . . . . ?                                       
N2 U1 C61 C62 123.9(9) . . . . ?                                        
C65 U1 C61 C62 -113.7(10) . . . . ?                                     
C64 U1 C61 C62 -76.9(7) . . . . ?                                       
C63 U1 C61 C62 -37.1(7) . . . . ?                                       
O1 U1 C61 C71 -174.9(9) . . . . ?                                       
O2 U1 C61 C71 5.2(10) . . . . ?                                         
N1 U1 C61 C71 -72.9(10) . . . . ?                                       
N3 U1 C61 C71 82.8(10) . . . . ?                                        
N2 U1 C61 C71 2.3(16) . . . . ?                                         
C62 U1 C61 C71 -121.6(13) . . . . ?                                     
C65 U1 C61 C71 124.7(12) . . . . ?                                      
C64 U1 C61 C71 161.5(12) . . . . ?                                      
C63 U1 C61 C71 -158.7(12) . . . . ?                                     
C65 C61 C62 C63 0.0(11) . . . . ?                                       
C71 C61 C62 C63 -173.3(10) . . . . ?                                    
U1 C61 C62 C63 70.4(7) . . . . ?                                        
C65 C61 C62 C72 170.1(9) . . . . ?                                      
C71 C61 C62 C72 -3.2(16) . . . . ?                                      
U1 C61 C62 C72 -119.5(10) . . . . ?                                     
C65 C61 C62 U1 -70.4(7) . . . . ?                                       
C71 C61 C62 U1 116.3(10) . . . . ?                                      
O1 U1 C62 C63 22.2(7) . . . . ?                                         
O2 U1 C62 C63 -161.8(7) . . . . ?                                       
N1 U1 C62 C63 111.9(7) . . . . ?                                        
N3 U1 C62 C63 -76.8(8) . . . . ?                                        
N2 U1 C62 C63 110.7(9) . . . . ?                                        
C61 U1 C62 C63 -112.1(10) . . . . ?                                     
C65 U1 C62 C63 -76.1(7) . . . . ?                                       
C64 U1 C62 C63 -37.0(6) . . . . ?                                       
O1 U1 C62 C61 134.3(7) . . . . ?                                        
O2 U1 C62 C61 -49.7(7) . . . . ?                                        
N1 U1 C62 C61 -136.0(7) . . . . ?                                       
N3 U1 C62 C61 35.3(9) . . . . ?                                         
N2 U1 C62 C61 -137.2(7) . . . . ?                                       
C65 U1 C62 C61 36.0(6) . . . . ?                                        
C64 U1 C62 C61 75.1(7) . . . . ?                                        
C63 U1 C62 C61 112.1(10) . . . . ?                                      
O1 U1 C62 C72 -106.8(12) . . . . ?                                      
O2 U1 C62 C72 69.3(11) . . . . ?                                        
N1 U1 C62 C72 -17.1(12) . . . . ?                                       
N3 U1 C62 C72 154.3(10) . . . . ?                                       
N2 U1 C62 C72 -18.2(16) . . . . ?                                       
C61 U1 C62 C72 119.0(15) . . . . ?                                      
C65 U1 C62 C72 154.9(13) . . . . ?                                      
C64 U1 C62 C72 -165.9(13) . . . . ?                                     
C63 U1 C62 C72 -128.9(14) . . . . ?                                     
C61 C62 C63 C64 -0.6(11) . . . . ?                                      
C72 C62 C63 C64 -169.6(10) . . . . ?                                    
U1 C62 C63 C64 68.8(7) . . . . ?                                        
C61 C62 C63 C73 175.2(10) . . . . ?                                     
C72 C62 C63 C73 6.1(18) . . . . ?                                       
U1 C62 C63 C73 -115.5(11) . . . . ?                                     
C61 C62 C63 U1 -69.3(6) . . . . ?                                       
C72 C62 C63 U1 121.6(11) . . . . ?                                      
O1 U1 C63 C62 -157.1(7) . . . . ?                                       
O2 U1 C63 C62 20.6(7) . . . . ?                                         
N1 U1 C63 C62 -71.7(6) . . . . ?                                        
N3 U1 C63 C62 127.8(6) . . . . ?                                        
N2 U1 C63 C62 -129.4(7) . . . . ?                                       
C61 U1 C63 C62 37.9(6) . . . . ?                                        
C65 U1 C63 C62 76.6(7) . . . . ?                                        
C64 U1 C63 C62 113.5(10) . . . . ?                                      
O1 U1 C63 C64 89.5(6) . . . . ?                                         
O2 U1 C63 C64 -92.9(6) . . . . ?                                        
N1 U1 C63 C64 174.9(6) . . . . ?                                        
N3 U1 C63 C64 14.3(8) . . . . ?                                         
N2 U1 C63 C64 117.2(7) . . . . ?                                        
C61 U1 C63 C64 -75.6(7) . . . . ?                                       
C62 U1 C63 C64 -113.5(10) . . . . ?                                     
C65 U1 C63 C64 -36.9(6) . . . . ?                                       
O1 U1 C63 C73 -33.5(10) . . . . ?                                       
O2 U1 C63 C73 144.1(10) . . . . ?                                       
N1 U1 C63 C73 51.9(10) . . . . ?                                        
N3 U1 C63 C73 -108.7(10) . . . . ?                                      
N2 U1 C63 C73 -5.8(13) . . . . ?                                        
C61 U1 C63 C73 161.4(12) . . . . ?                                      
C62 U1 C63 C73 123.5(13) . . . . ?                                      
C65 U1 C63 C73 -159.9(12) . . . . ?                                     
C64 U1 C63 C73 -123.0(13) . . . . ?                                     
C62 C63 C64 C65 0.9(11) . . . . ?                                       
C73 C63 C64 C65 -174.8(10) . . . . ?                                    
U1 C63 C64 C65 69.6(7) . . . . ?                                        
C62 C63 C64 C74 172.9(9) . . . . ?                                      
C73 C63 C64 C74 -2.9(16) . . . . ?                                      
U1 C63 C64 C74 -118.5(10) . . . . ?                                     
C62 C63 C64 U1 -68.7(7) . . . . ?                                       
C73 C63 C64 U1 115.6(10) . . . . ?                                      
O1 U1 C64 C65 165.1(7) . . . . ?                                        
O2 U1 C64 C65 -11.3(7) . . . . ?                                        
N1 U1 C64 C65 -119.5(6) . . . . ?                                       
N3 U1 C64 C65 78.7(6) . . . . ?                                         
N2 U1 C64 C65 129.8(6) . . . . ?                                        
C61 U1 C64 C65 -36.3(6) . . . . ?                                       
C62 U1 C64 C65 -76.3(6) . . . . ?                                       
C63 U1 C64 C65 -112.9(9) . . . . ?                                      
O1 U1 C64 C63 -82.0(7) . . . . ?                                        
O2 U1 C64 C63 101.6(7) . . . . ?                                        
N1 U1 C64 C63 -6.6(8) . . . . ?                                         
N3 U1 C64 C63 -168.4(6) . . . . ?                                       
N2 U1 C64 C63 -117.3(7) . . . . ?                                       
C61 U1 C64 C63 76.6(7) . . . . ?                                        
C62 U1 C64 C63 36.5(6) . . . . ?                                        
C65 U1 C64 C63 112.9(9) . . . . ?                                       
O1 U1 C64 C74 38.6(10) . . . . ?                                        
O2 U1 C64 C74 -137.8(10) . . . . ?                                      
N1 U1 C64 C74 114.0(10) . . . . ?                                       
N3 U1 C64 C74 -47.8(10) . . . . ?                                       
N2 U1 C64 C74 3.3(14) . . . . ?                                         
C61 U1 C64 C74 -162.8(12) . . . . ?                                     
C62 U1 C64 C74 157.1(12) . . . . ?                                      
C65 U1 C64 C74 -126.5(13) . . . . ?                                     
C63 U1 C64 C74 120.6(13) . . . . ?                                      
C62 C61 C65 C64 0.6(11) . . . . ?                                       
C71 C61 C65 C64 173.7(10) . . . . ?                                     
U1 C61 C65 C64 -69.4(7) . . . . ?                                       
C62 C61 C65 C75 -170.7(9) . . . . ?                                     
C71 C61 C65 C75 2.3(17) . . . . ?                                       
U1 C61 C65 C75 119.3(10) . . . . ?                                      
C62 C61 C65 U1 70.0(7) . . . . ?                                        
C71 C61 C65 U1 -117.0(11) . . . . ?                                     
C63 C64 C65 C61 -1.0(11) . . . . ?                                      
C74 C64 C65 C61 -172.4(10) . . . . ?                                    
U1 C64 C65 C61 68.9(7) . . . . ?                                        
C63 C64 C65 C75 170.5(9) . . . . ?                                      
C74 C64 C65 C75 -0.9(17) . . . . ?                                      
U1 C64 C65 C75 -119.7(9) . . . . ?                                      
C63 C64 C65 U1 -69.8(7) . . . . ?                                       
C74 C64 C65 U1 118.8(11) . . . . ?                                      
O1 U1 C65 C61 -128.4(6) . . . . ?                                       
O2 U1 C65 C61 56.1(6) . . . . ?                                         
N1 U1 C65 C61 -25.0(8) . . . . ?                                        
N3 U1 C65 C61 142.4(6) . . . . ?                                        
N2 U1 C65 C61 135.9(7) . . . . ?                                        
C62 U1 C65 C61 -37.2(6) . . . . ?                                       
C64 U1 C65 C61 -113.7(9) . . . . ?                                      
C63 U1 C65 C61 -76.4(6) . . . . ?                                       
O1 U1 C65 C64 -14.7(7) . . . . ?                                        
O2 U1 C65 C64 169.8(6) . . . . ?                                        
N1 U1 C65 C64 88.7(7) . . . . ?                                         
N3 U1 C65 C64 -104.0(6) . . . . ?                                       
N2 U1 C65 C64 -110.4(8) . . . . ?                                       
C61 U1 C65 C64 113.7(9) . . . . ?                                       
C62 U1 C65 C64 76.5(7) . . . . ?                                        
C63 U1 C65 C64 37.3(6) . . . . ?                                        
O1 U1 C65 C75 108.0(9) . . . . ?                                        
O2 U1 C65 C75 -67.5(9) . . . . ?                                        
N1 U1 C65 C75 -148.6(9) . . . . ?                                       
N3 U1 C65 C75 18.8(9) . . . . ?                                         
N2 U1 C65 C75 12.3(13) . . . . ?                                        
C61 U1 C65 C75 -123.6(12) . . . . ?                                     
C62 U1 C65 C75 -160.8(11) . . . . ?                                     
C64 U1 C65 C75 122.7(12) . . . . ?                                      
C63 U1 C65 C75 160.0(11) . . . . ?                                      
C915 O911 C912 C913 27(3) . . . . ?                                     
O911 C912 C913 C914 -26(4) . . . . ?                                    
C912 C913 C914 C915 12(4) . . . . ?                                     
C913 C914 C915 O911 6(3) . . . . ?                                      
C912 O911 C915 C914 -18(2) . . . . ?                                    
C925 O921 C922 C923 -18(2) . . . . ?                                    
O921 C922 C923 C924 30.5(18) . . . . ?                                  
C922 C923 C924 C925 -31.8(16) . . . . ?                                 
C922 O921 C925 C924 -2(3) . . . . ?                                     
C923 C924 C925 O921 22(2) . . . . ?                                     
    
_iucr_refine_instruction_details
;
TITL xl in P2(1)2(1)2(1)
CELL 0.71073  11.3098  18.6329  19.8541  90.000  90.000  90.000
ZERR    4.00   0.0005   0.0007   0.0010   0.000   0.000   0.000
LATT -1
SYMM 0.5-X, -Y, 0.5+Z
SYMM -X, 0.5+Y, 0.5-Z
SYMM 0.5+X, 0.5-Y, -Z
SFAC        C       H       N       O       U
UNIT 168 204 16 4 4
OMIT     0   0   2
OMIT     1   0   2
OMIT     1   1   0
OMIT     0   1   1
TEMP -123.15
SIZE 0.30 0.60 0.90
DELU
L.S.  5
ACTA
BOND $H
CONF
PLAN -20
 
WGHT    0.000000   54.262100
FVAR       0.21023
U1    5    0.851404    0.838404    0.834967    11.00000    0.02076    0.01584 =
         0.02036    0.00240    0.00063    0.00006
O1    4    0.963396    0.837559    0.898745    11.00000    0.02492    0.02057 =
         0.02949    0.00569   -0.00294   -0.00171
O2    4    0.730861    0.824051    0.777720    11.00000    0.02397    0.02427 =
         0.02225   -0.00094    0.00117   -0.00386
O911  4    1.041567    0.915926    0.171544    11.00000    0.16932    0.22204 =
         0.13740    0.03463    0.03995    0.02605
O921  4    1.006589    0.632091    0.441186    11.00000    0.14831    0.21088 =
         0.09682    0.02427   -0.05097   -0.08600
N1    3    0.696827    0.849758    0.925309    11.00000    0.02890    0.02128 =
         0.02157    0.00605    0.00567    0.00213
N2    3    0.793368    0.722405    0.895157    11.00000    0.02310    0.01465 =
         0.02845    0.00465    0.00085    0.00218
N3    3    0.938988    0.725156    0.787576    11.00000    0.02732    0.01899 =
         0.02321   -0.00523    0.00122   -0.00283
C2    1    0.667418    0.793660    0.960841    11.00000    0.02278    0.02805 =
         0.02157    0.00690    0.00889    0.00483
C8    1    0.923032    0.664738    0.819103    11.00000    0.03492    0.01406 =
         0.03217   -0.00253    0.00491    0.00077
C11   1    0.638745    0.915663    0.939412    11.00000    0.03780    0.02477 =
         0.01386    0.00656    0.00640    0.00721
C12   1    0.531473    0.931216    0.905139    11.00000    0.03697    0.02516 =
         0.03392   -0.00742    0.00258    0.00494
C13   1    0.474682    0.995823    0.920183    11.00000    0.03703    0.03568 =
         0.02801    0.00716    0.00515    0.01115
AFIX  43
H13   2    0.402407    1.006654    0.898021    11.00000   -1.20000
AFIX   0
C14   1    0.519765    1.045070    0.966413    11.00000    0.04547    0.02808 =
         0.02696    0.00416    0.01779    0.00695
C15   1    0.623841    1.026572    0.998933    11.00000    0.04665    0.03175 =
         0.02795   -0.00255    0.01497    0.00787
AFIX  43
H15   2    0.655596    1.058674    1.031408    11.00000   -1.20000
AFIX   0
C16   1    0.682791    0.963678    0.986034    11.00000    0.03993    0.02662 =
         0.02589    0.00248    0.00643    0.00216
C17   1    0.477042    0.880867    0.857590    11.00000    0.03581    0.03583 =
         0.04222   -0.00370   -0.00682   -0.00968
AFIX 137
H17A  2    0.440967    0.841103    0.882518    11.00000   -1.50000
H17B  2    0.537663    0.862059    0.827055    11.00000   -1.50000
H17C  2    0.416120    0.905791    0.831418    11.00000   -1.50000
AFIX   0
C18   1    0.454051    1.113569    0.980240    11.00000    0.06138    0.04171 =
         0.05477    0.00108    0.00826    0.02201
AFIX 137
H18A  2    0.415170    1.129938    0.938890    11.00000   -1.50000
H18B  2    0.509736    1.150339    0.995711    11.00000   -1.50000
H18C  2    0.394379    1.105114    1.015140    11.00000   -1.50000
AFIX   0
C19   1    0.793560    0.944254    1.024850    11.00000    0.04184    0.03870 =
         0.04276   -0.00529   -0.00191    0.00446
AFIX 137
H19A  2    0.773012    0.911877    1.061946    11.00000   -1.50000
H19B  2    0.829641    0.987966    1.043044    11.00000   -1.50000
H19C  2    0.849693    0.920350    0.994672    11.00000   -1.50000
AFIX   0
C1   1    0.574022    0.798033    1.015802    11.00000    0.05067    0.02952 =
         0.03750    0.00888    0.02303    0.00366
AFIX 137
H21A  2    0.588455    0.840516    1.043717    11.00000   -1.50000
H21B  2    0.577929    0.754866    1.043915    11.00000   -1.50000
H21C  2    0.495499    0.801534    0.995190    11.00000   -1.50000
AFIX   0
C3   1    0.721356    0.725216    0.948935    11.00000    0.02692    0.02445 =
         0.02644    0.00711    0.00468    0.00191
C4   1    0.700602    0.661468    0.989970    11.00000    0.05196    0.02867 =
         0.03242    0.02133    0.01013    0.00190
AFIX  43
H32   2    0.646898    0.662825    1.026740    11.00000   -1.20000
AFIX   0
C5   1    0.760180    0.599590    0.974376    11.00000    0.03634    0.02354 =
         0.05071    0.01881    0.00761   -0.00516
AFIX  43
H33   2    0.750325    0.558972    1.002747    11.00000   -1.20000
AFIX   0
C6   1    0.836232    0.593572    0.917462    11.00000    0.04476    0.01990 =
         0.03987    0.01544   -0.00048    0.00307
AFIX  43
H34   2    0.874747    0.550121    0.905409    11.00000   -1.20000
AFIX   0
C7   1    0.850181    0.661860    0.878220    11.00000    0.02280    0.01732 =
         0.03161   -0.00277    0.00312   -0.00700
C9   1    0.979170    0.594202    0.797364    11.00000    0.05956    0.01987 =
         0.04428   -0.00356    0.02644    0.00045
AFIX 137
H41A  2    1.019486    0.600852    0.754120    11.00000   -1.50000
H41B  2    0.917626    0.557533    0.792559    11.00000   -1.50000
H41C  2    1.036543    0.578805    0.831415    11.00000   -1.50000
AFIX   0
C51   1    1.010610    0.723449    0.727375    11.00000    0.03323    0.01820 =
         0.03011    0.00667    0.00468    0.00764
C52   1    0.956601    0.716168    0.664484    11.00000    0.04142    0.02469 =
         0.03009   -0.00308    0.00394    0.00151
C53   1    1.028247    0.713782    0.606908    11.00000    0.05347    0.02883 =
         0.02768   -0.00330    0.00934    0.00933
AFIX  43
H53   2    0.992879    0.706758    0.564011    11.00000   -1.20000
AFIX   0
C54   1    1.149061    0.721456    0.611539    11.00000    0.05335    0.02679 =
         0.04497   -0.01080    0.02229    0.00776
C55   1    1.201269    0.728555    0.673305    11.00000    0.03363    0.02679 =
         0.05108   -0.00759    0.01707   -0.00106
AFIX  43
H55   2    1.284769    0.733270    0.676032    11.00000   -1.20000
AFIX   0
C56   1    1.134870    0.729017    0.732103    11.00000    0.04055    0.02413 =
         0.03432    0.00717    0.00433    0.00851
C57   1    0.825105    0.705430    0.658887    11.00000    0.04723    0.05785 =
         0.03463   -0.01974    0.00062   -0.00926
AFIX 133
H57A  2    0.785143    0.732950    0.694259    11.00000   -1.50000
H57B  2    0.806515    0.654362    0.664106    11.00000   -1.50000
H57C  2    0.798014    0.721986    0.614650    11.00000   -1.50000
AFIX   0
C58   1    1.224063    0.717662    0.547948    11.00000    0.06674    0.04622 =
         0.04923   -0.00547    0.02570    0.00924
AFIX 137
H58A  2    1.191023    0.681586    0.517356    11.00000   -1.50000
H58B  2    1.305238    0.704352    0.559872    11.00000   -1.50000
H58C  2    1.224199    0.764606    0.525690    11.00000   -1.50000
AFIX   0
C59   1    1.192390    0.733680    0.800718    11.00000    0.02497    0.06112 =
         0.04773   -0.00218   -0.00028    0.01429
AFIX 137
H59A  2    1.203484    0.685233    0.818864    11.00000   -1.50000
H59B  2    1.141625    0.761364    0.831134    11.00000   -1.50000
H59C  2    1.269340    0.757465    0.796626    11.00000   -1.50000
AFIX   0
C61   1    0.847426    0.954249    0.743288    11.00000    0.02417    0.02119 =
         0.03578    0.01255   -0.00639    0.00213
C62   1    0.846269    0.987833    0.807271    11.00000    0.02732    0.02031 =
         0.03913    0.01100    0.01983    0.00236
C63   1    0.957978    0.977364    0.835727    11.00000    0.04850    0.01461 =
         0.02677    0.00377   -0.00495   -0.00954
C64   1    1.026442    0.937016    0.789580    11.00000    0.01726    0.02958 =
         0.03494    0.01648   -0.00411   -0.00072
C65   1    0.956681    0.924098    0.732769    11.00000    0.02371    0.01472 =
         0.02178    0.00454    0.00507    0.00204
C71   1    0.748481    0.959563    0.692899    11.00000    0.04102    0.07790 =
         0.06707    0.04257   -0.02156   -0.01495
AFIX 137
H71A  2    0.763279    0.926261    0.655636    11.00000   -1.50000
H71B  2    0.744182    1.008699    0.675463    11.00000   -1.50000
H71C  2    0.673523    0.947193    0.714771    11.00000   -1.50000
AFIX   0
C72   1    0.747231    1.035541    0.829491    11.00000    0.06448    0.02733 =
         0.09897    0.01558    0.03712    0.02285
AFIX 137
H72A  2    0.752206    1.043071    0.878260    11.00000   -1.50000
H72B  2    0.671439    1.012942    0.818420    11.00000   -1.50000
H72C  2    0.753191    1.081853    0.806343    11.00000   -1.50000
AFIX   0
C73   1    1.001725    1.008368    0.901853    11.00000    0.11302    0.04616 =
         0.03871    0.00336   -0.01776   -0.03473
AFIX 137
H73A  2    0.937163    1.034307    0.924017    11.00000   -1.50000
H73B  2    1.067329    1.041445    0.893125    11.00000   -1.50000
H73C  2    1.028939    0.969376    0.931128    11.00000   -1.50000
AFIX   0
C74   1    1.155559    0.922325    0.799161    11.00000    0.02048    0.05417 =
         0.09384    0.03321   -0.00684   -0.00908
AFIX 137
H74A  2    1.179234    0.881907    0.770600    11.00000   -1.50000
H74B  2    1.170702    0.910453    0.846467    11.00000   -1.50000
H74C  2    1.201219    0.965003    0.786683    11.00000   -1.50000
AFIX   0
C75   1    1.000422    0.892867    0.668198    11.00000    0.09084    0.02413 =
         0.03955   -0.00654    0.03488   -0.00294
AFIX 137
H75A  2    0.941851    0.858926    0.650630    11.00000   -1.50000
H75B  2    1.075256    0.867759    0.676192    11.00000   -1.50000
H75C  2    1.012882    0.931406    0.635367    11.00000   -1.50000
AFIX   0
C912  1    1.005705    0.835314    0.176199    11.00000    0.12055    0.27128 =
         0.16308   -0.14367    0.10428   -0.09573
AFIX  23
H91A  2    0.936625    0.826258    0.146777    11.00000   -1.20000
H91B  2    1.071888    0.804972    0.160255    11.00000   -1.20000
AFIX   0
C913  1    0.979741    0.818469    0.237323    11.00000    0.22889    0.04975 =
         0.14461   -0.01667   -0.07789    0.01076
AFIX  23
H91C  2    1.002333    0.767909    0.245648    11.00000   -1.20000
H91D  2    0.893248    0.822672    0.243904    11.00000   -1.20000
AFIX   0
C914  1    1.033373    0.859374    0.280076    11.00000    0.07078    0.10878 =
         0.13479   -0.01077   -0.04067    0.01712
AFIX  23
H91E  2    1.096452    0.831910    0.303116    11.00000   -1.20000
H91F  2    0.976576    0.876236    0.314560    11.00000   -1.20000
AFIX   0
C915  1    1.086535    0.922866    0.244181    11.00000    0.08359    0.08777 =
         0.18902   -0.03120   -0.02149    0.00457
AFIX  23
H91G  2    1.173975    0.921009    0.245705    11.00000   -1.20000
H91H  2    1.059631    0.968463    0.264682    11.00000   -1.20000
AFIX   0
C922  1    1.013333    0.670960    0.380542    11.00000    0.06369    0.07478 =
         0.13618    0.00811    0.01190   -0.01352
AFIX  23
H92A  2    1.095442    0.672503    0.363321    11.00000   -1.20000
H92B  2    0.984077    0.720636    0.386474    11.00000   -1.20000
AFIX   0
C923  1    0.934693    0.629127    0.334395    11.00000    0.07318    0.05898 =
         0.06079    0.00127    0.01369    0.03096
AFIX  23
H92C  2    0.897766    0.660929    0.300437    11.00000   -1.20000
H92D  2    0.979750    0.591104    0.310852    11.00000   -1.20000
AFIX   0
C924  1    0.844407    0.597645    0.379119    11.00000    0.06330    0.05779 =
         0.05945   -0.01243    0.00249   -0.00153
AFIX  23
H92E  2    0.814282    0.551740    0.360791    11.00000   -1.20000
H92F  2    0.777265    0.631009    0.385687    11.00000   -1.20000
AFIX   0
C925  1    0.910141    0.586056    0.443332    11.00000    0.08809    0.09797 =
         0.08173    0.03471   -0.01887   -0.00109
AFIX  23
H92G  2    0.859209    0.597283    0.482494    11.00000   -1.20000
H92H  2    0.936712    0.535578    0.446941    11.00000   -1.20000
HKLF      4
 
REM  xl in P2(1)2(1)2(1)
REM R1 =  0.0616 for   7865 Fo > 4sig(Fo)  and  0.0966 for all   9939 data
REM    490 parameters refined using    199 restraints
 
END  
     
WGHT      0.0000     54.1634 
REM Highest difference peak  1.369,  deepest hole -1.506,  1-sigma level  0.191
Q1    1   0.6482  1.1597  0.9953  11.00000  0.05    1.37
Q2    1   0.4496  0.8385  0.8344  11.00000  0.05    1.14
Q3    1   1.1916  0.8027  0.6375  11.00000  0.05    0.92
Q4    1   0.8506  0.4889  0.8328  11.00000  0.05    0.84
Q5    1   0.9501  0.6604  0.5055  11.00000  0.05    0.83
Q6    1   1.3627  0.7575  0.5603  11.00000  0.05    0.79
Q7    1   0.8629  1.0774  0.8633  11.00000  0.05    0.77
Q8    1   0.9549  0.8304  0.2453  11.00000  0.05    0.76
Q9    1   0.8426  0.9842  0.6623  11.00000  0.05    0.74
Q10   1   0.6395  0.8414  1.0768  11.00000  0.05    0.74
Q11   1   1.3395  0.7578  0.6979  11.00000  0.05    0.68
Q12   1   0.9801  0.4981  0.8082  11.00000  0.05    0.68
Q13   1   1.0565  0.8339  0.2296  11.00000  0.05    0.67
Q14   1   1.2041  0.8046  0.6962  11.00000  0.05    0.67
Q15   1   1.2736  0.8014  0.8379  11.00000  0.05    0.67
Q16   1   1.1019  0.8670  0.6669  11.00000  0.05    0.67
Q17   1   1.0492  0.8219  0.2128  11.00000  0.05    0.65
Q18   1   0.6085  1.2424  1.0011  11.00000  0.05    0.64
Q19   1   0.3777  0.8766  0.8254  11.00000  0.05    0.64
Q20   1   0.9669  0.5924  0.3453  11.00000  0.05    0.63
;
